# Supplementary material for: TWEAK activation of the non-canonical NF-κB signaling pathway differentially regulates melanoma and prostate cancer cell invasion
Source: PubMed Central journal article supplement (PMC5348407; doi:10.18632/oncotarget.13034), 2016-11-03
Supplement: oncotarget-07-81474-s001.pdf [file oncotarget-07-81474-s001.pdf]

## TWEAK activation of the non-canonical NF- $\kappa$ B signaling pathway differentially regulates melanoma and prostate cancer cell invasion

### SUPPLEMENTARY FIGURES

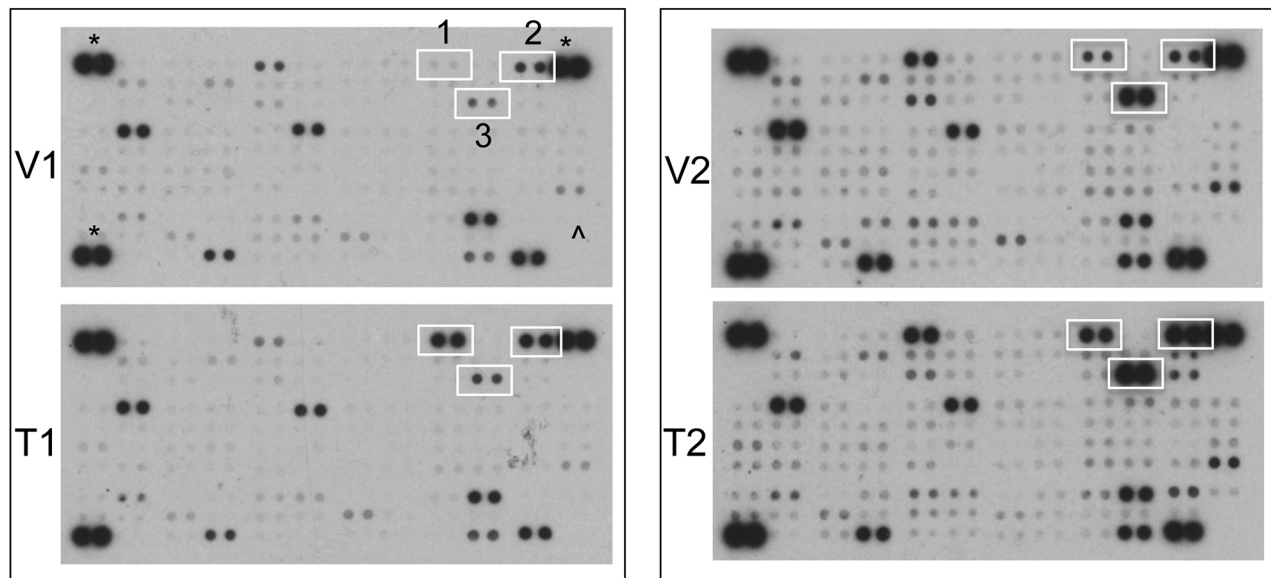

**Supplementary Figure S1: Effect of TWEAK overexpression in B16 cells on cytokine/chemokine expression.** Normalized amounts of B16 V1, V2, T1, and T2 cell conditioned media sample were added to Mouse XL Cytokine Antibody membranes containing 111 capture antibodies spotted in duplicate (R & D Systems). Immunoreactive proteins were detected according to manufacturer's instructions. On membrane V1, positive and negative control reference spots are indicated with an asterisk and a caret sign, respectively. Spots corresponding to three TWEAK-inducible chemokines are boxed on all four membranes and identified by numbers on V1. 1= CCL2/JE/MCP-1, 2= CCL5/RANTES, 3= CXCL1/KC. Increased expression of these three proteins was also detected using cell lysates and another cytokine antibody array containing fewer capture antibodies (Mouse Cytokine Array Kit, Panel A (R & D Systems)).

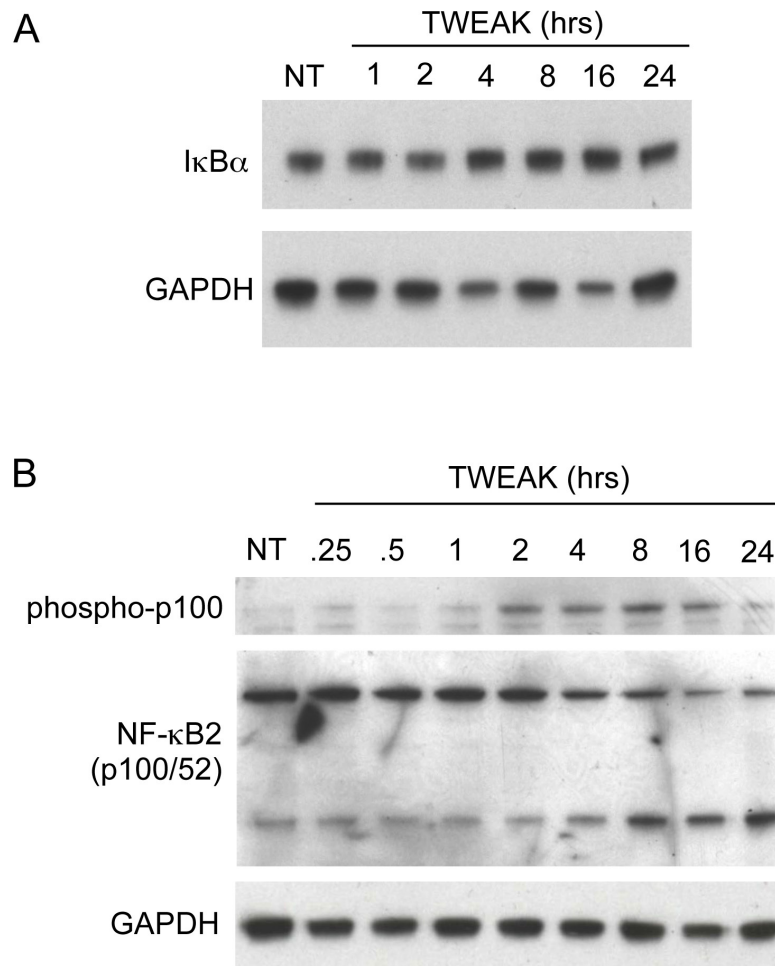

**Supplementary Figure S2: Effect of TWEAK treatment on B16 V1 melanoma cells.** Cells were either left untreated (NT, no treatment) or treated with 200 ng/ml TWEAK for the indicated time periods. Cells were harvested and I $\kappa$ B $\alpha$  and GAPDH levels (**panel A**) or phospho-p100, NF- $\kappa$ B2 (p100/52), and GAPDH levels (**panel B**) were analyzed by Western blotting. These Western blots were done two times.
